# Supplementary material for: Modified ion-Weibel instability as a possible source of wave activity at Comet 67P/Churyumov-Gerasimenko
Source: Copernicus journal article supplement (doi:10.5194/angeo-34-691-2016), 2016-08-31
Supplement: Supplementary file 1 [file angeo-34-691-2016-supplement.zip]

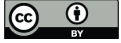

## *Supplement of*

# **Modified ion-Weibel instability as a possible source of wave activity at Comet 67P/Churyumov-Gerasimenko**

**Patrick Meier et al.**

*Correspondence to:* Patrick Meier ([patrick.meier@tu-bs.de](mailto:patrick.meier@tu-bs.de))

- [angeo-34-691-2016-supplement-title-page.pdf](#)
- supplement
  - [fig02\\_raw.dat](#)
  - [fig03\\_phi106\\_raw.dat](#)
  - [fig03\\_phi86\\_raw.dat](#)
  - [fig03\\_phi96\\_raw.dat](#)
  - [fig04\\_raw.dat](#)
  - [fig05\\_phi\\_raw.dat](#)
  - [fig05\\_theta\\_raw.dat](#)
  - [fig10\\_raw.dat.dat](#)
  - [fig11\\_raw.dat.dat](#)
  - [fig12\\_raw.dat.dat](#)

The copyright of individual parts of the supplement might differ from the CC-BY 3.0 licence.
